# Supplementary material for: One-Pot Green Synthesis of Graphene Nanosheets Encapsulated Gold Nanoparticles for Sensitive and Selective Detection of Dopamine
Source: PubMed Central journal article supplement (PMC5269579; doi:10.1038/srep41213), 2017-01-27
Supplement: srep41213-s1.pdf [file srep41213-s1.pdf]

## Supporting information

### **One-Pot Green Synthesis of Graphene Nanosheets Encapsulated Gold Nanoparticles for Sensitive and Selective Detection of Dopamine**

Balamurugan Thirumalraj,<sup>a</sup> Chellakannu Rajkumar,<sup>a</sup> Shen-Ming Chen\*<sup>a</sup> and Selvakumar Palanisamy <sup>a</sup>

<sup>a</sup>Department of Chemical Engineering and Biotechnology, National Taipei University of Technology, Taipei 106, Taiwan, ROC.

\* Corresponding author: S.M. Chen; E-mail: [smchen78@ms15.hinet.net](mailto:smchen78@ms15.hinet.net); Fax: +886 2270 25238; Tel: +886 2270 17147.

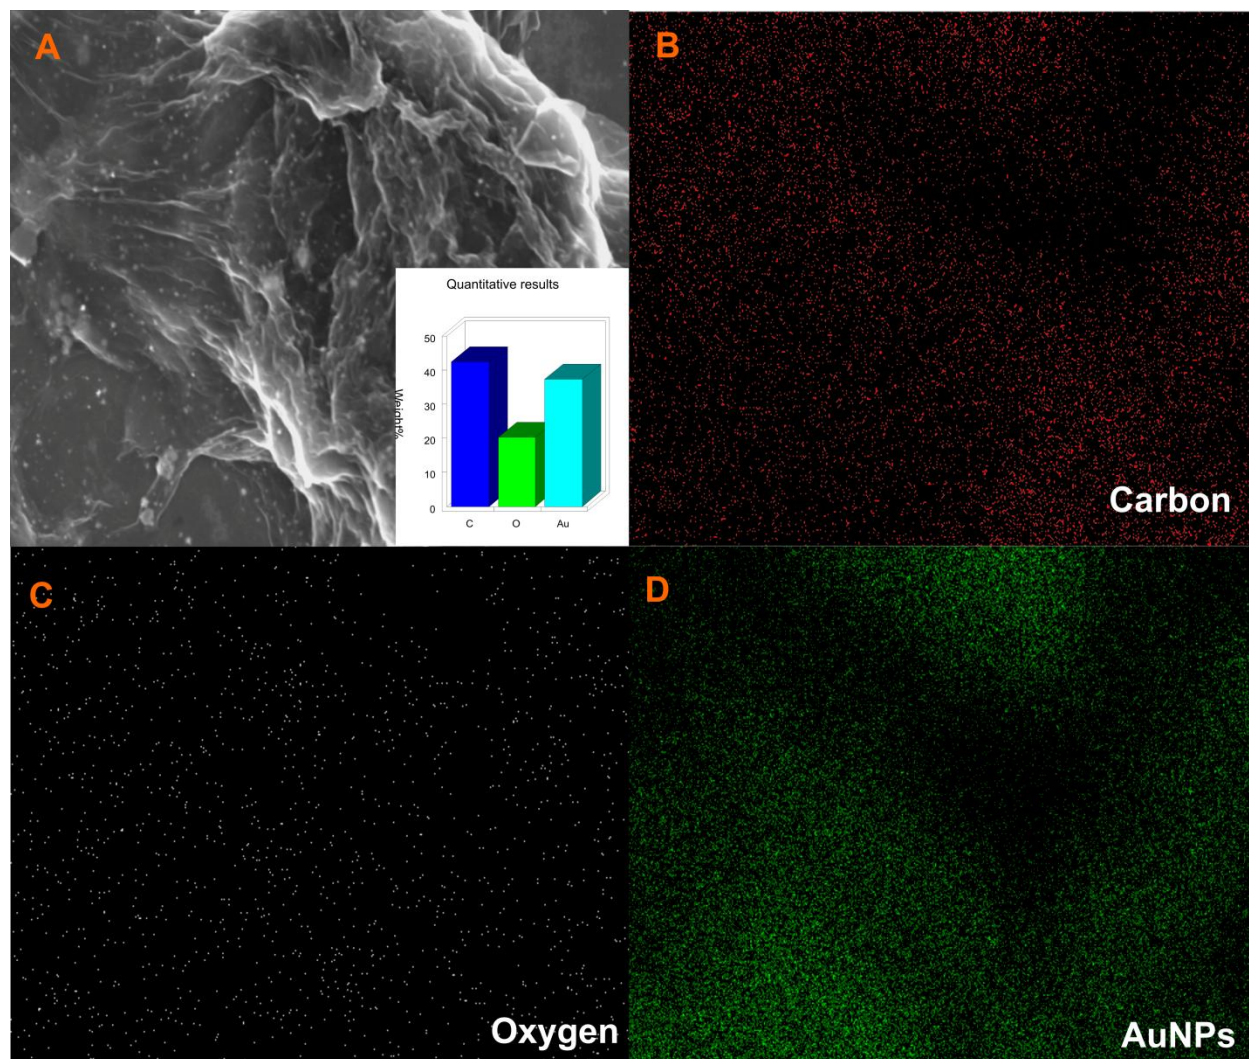

**Figure S1.** SEM image for GA-RGO/AuNPs (inset: Elemental weight percentage for C, O and Au) and corresponding elemental mapping (B–D).

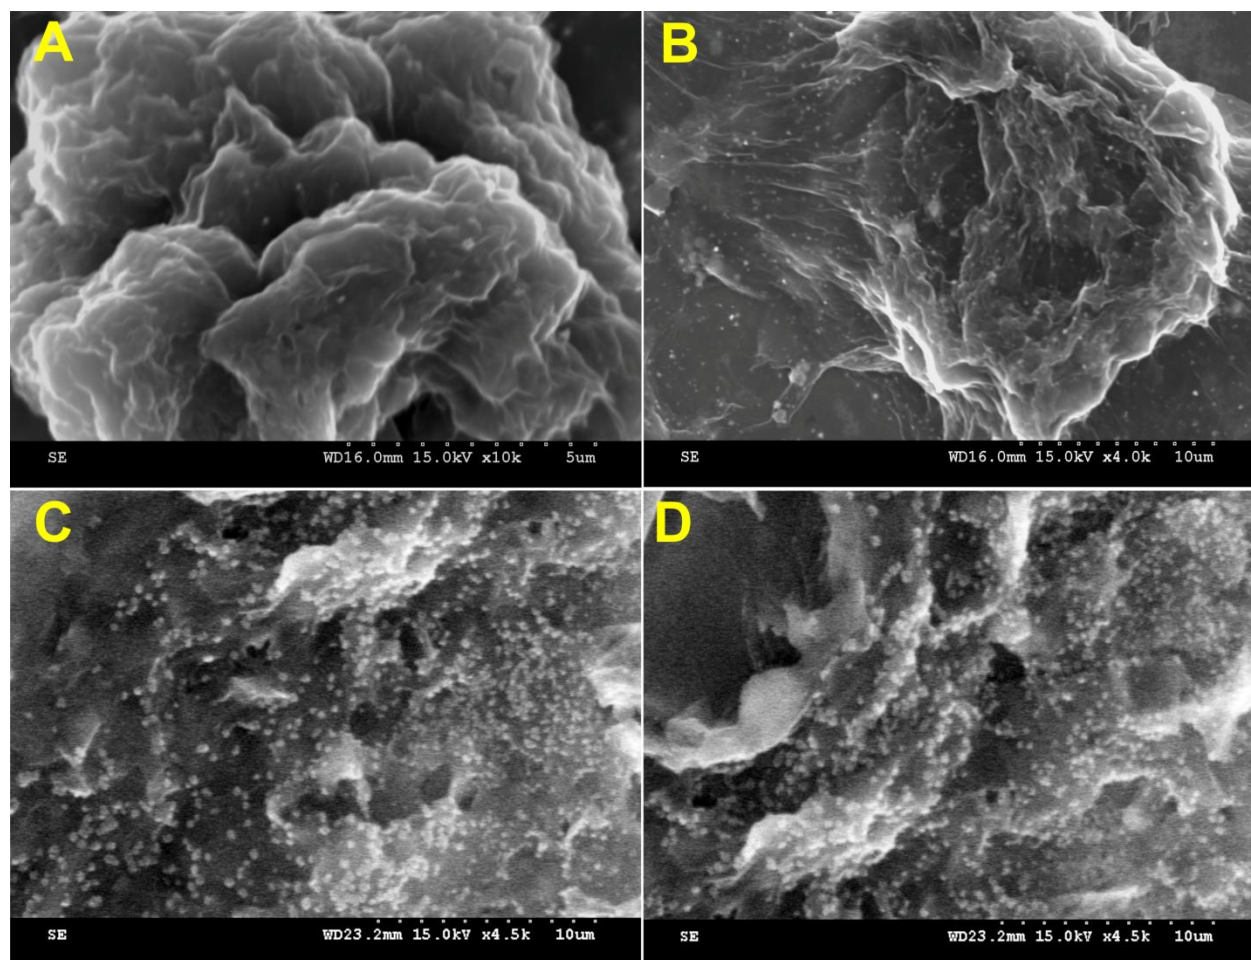

**Figure S2.** SEM images of GA-RGO/AuNPs composites in different concentrations of  $\text{AuCl}_4$  solution 0.1 mM (A), 0.5 mM (B), 0.7 mM (C) and 1.4 mM (D).

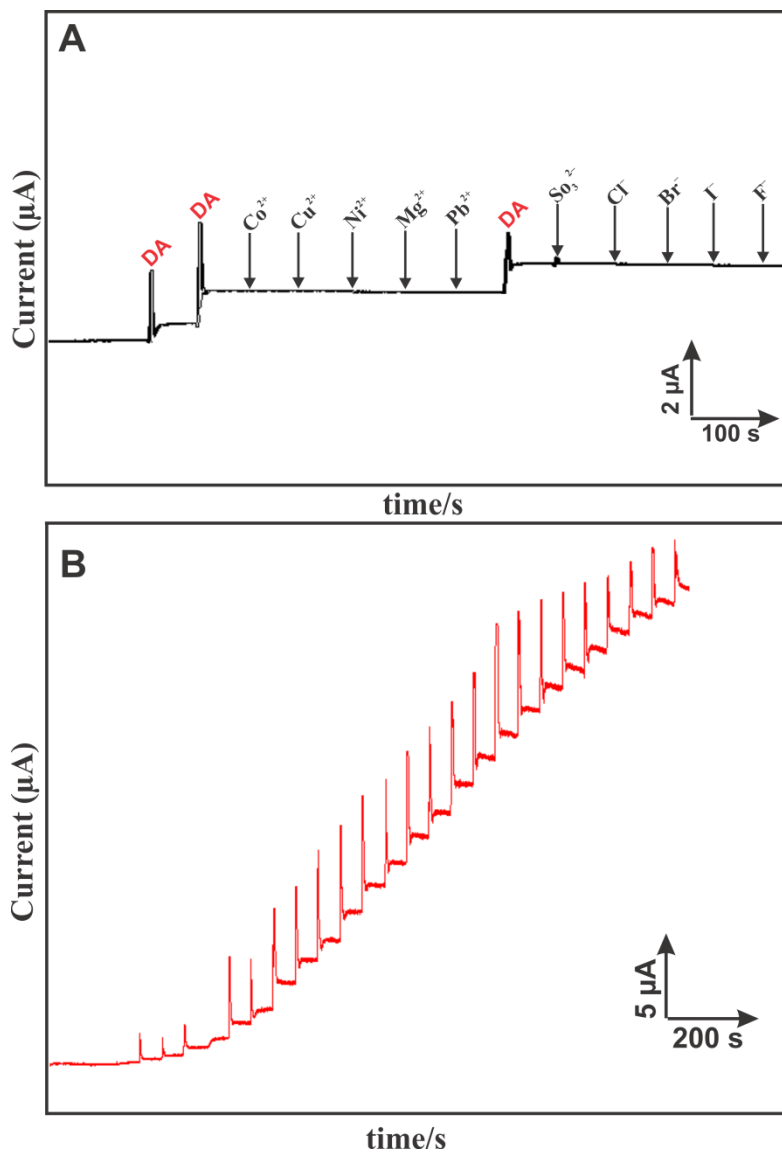

**Figure S3.** (A) Amperometric i-t responses for the successive addition of 1  $\mu\text{M}$  DA and 200 fold excess concentrations of  $\text{Co}^{2+}$ ,  $\text{Cu}^{2+}$ ,  $\text{Ni}^{2+}$ ,  $\text{Mg}^{2+}$ ,  $\text{Pb}^{2+}$ ,  $\text{SO}_3^{2-}$ ,  $\text{Cl}^-$ ,  $\text{Br}^-$ ,  $\text{I}^-$  and  $\text{F}^-$  in 0.05 M PBS (pH 7.0) solution. (B) Amperometric i-t response for the response current for DA using GA-RGO/AuNPs. The response time of the sensor = 3 s.

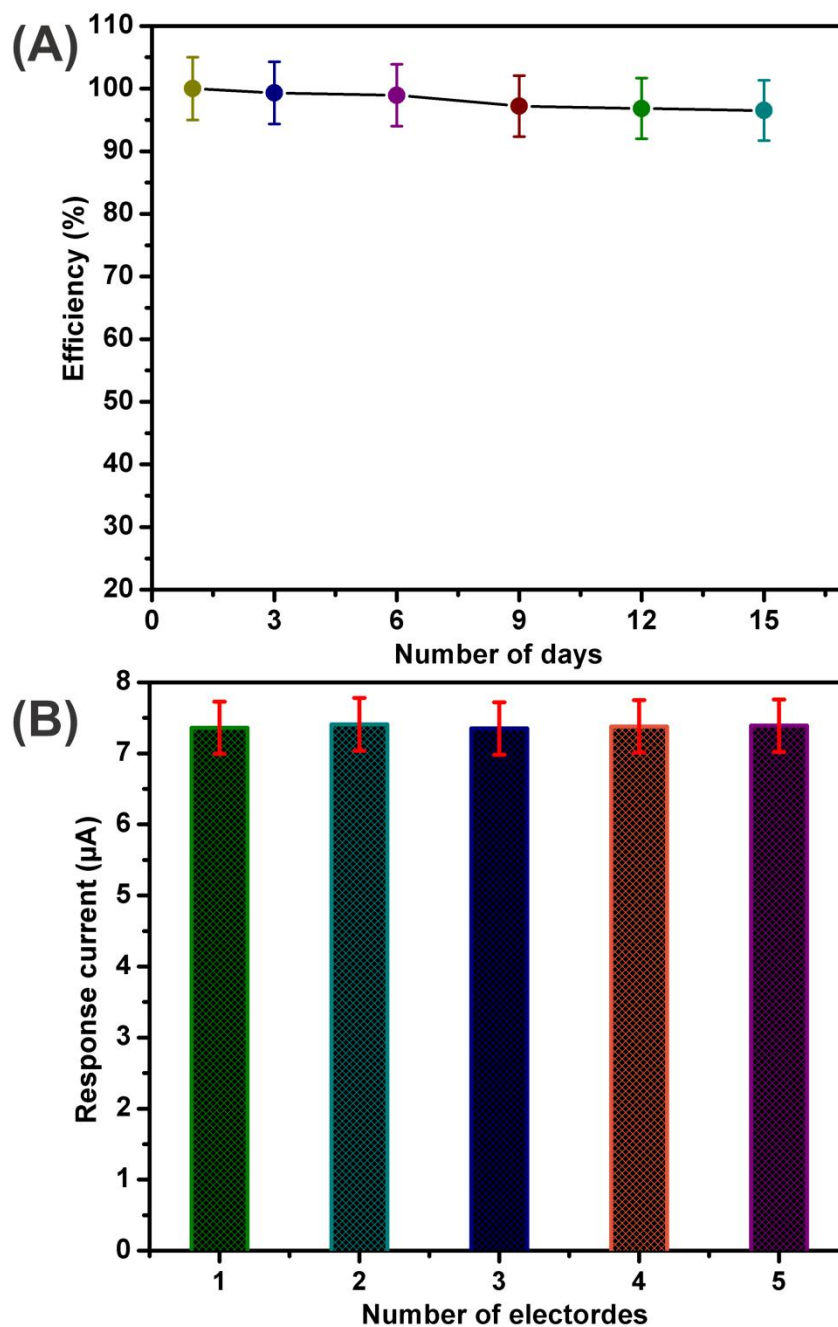

**Figure S4.** (A) Responses current for DA oxidation using GA-RGO/AuNPs modified electrode for every 3 days time intervals. (B) Response current for DA oxidation using five different GA-RGO/AuNPs in solution containing 100  $\mu\text{M}$  DA,  $\text{N}_2$  saturated 0.05 M PBS, and scan rate of 50 mV/s.

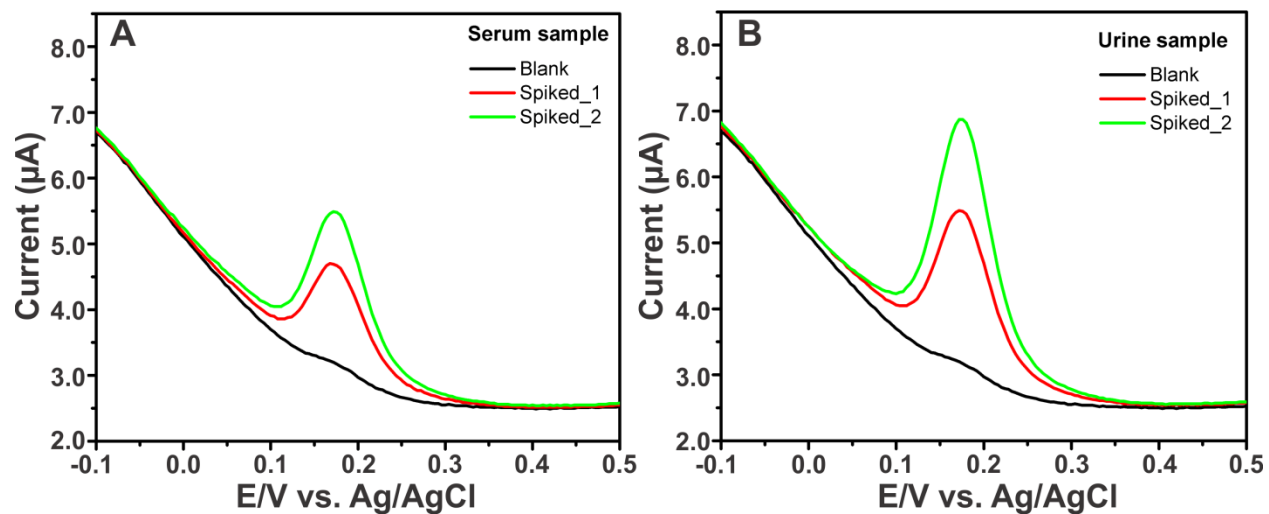

**Figure S5.** (A) DPV response for the determination of DA in human serum sample and (B) DPV responses for the determination of DA in urine sample. Experimental condition: 0.05 M PBS (pH 7),  $\text{N}_2$  atmosphere.
